# Supplementary material for: Use of Mental Health Services by Children With Mental Disorders in Two Major Cities in Brazil
Source: Atypon-hosted journal article supplement (doi:10.1176/appi.ps.201800389), 2019-01-17
Supplement: appi.ps.201800389.ds001.pdf [file appi.ps.201800389.ds001.pdf]

**Supplemental table S1.** Prevalence of mental health service use among children diagnosed with mental disorders, by child, mother, and family characteristics stratified by city<sup>a</sup>.

|                                                       |           | São Paulo        |                  | Porto Alegre     |                  |
|-------------------------------------------------------|-----------|------------------|------------------|------------------|------------------|
|                                                       |           | Met need         | Unmet need       | Met need         | Unmet need       |
|                                                       |           | % (95% CI)       |                  | % (95% CI)       |                  |
| <b>Child gender</b>                                   | Male      | 73.1 (51.3-87.5) | 61.4 (52.4-69.7) | 55.6 (41.8-68.7) | 54.3 (46.2-62.3) |
|                                                       | Female    | 26.9 (12.5-48.7) | 38.6 (30.3-47.6) | 44.3 (31.3-58.2) | 45.7 (37.8-53.8) |
| <b>Child age</b>                                      | ≥10       | 65.0 (42.7-82.2) | 61.5 (52.3-70.0) | 54.5 (40.6-67.7) | 54.4 (46.1-62.6) |
|                                                       | 6-9       | 35.0 (17.8-57.3) | 38.5 (30.0-47.6) | 45.5 (32.3-59.4) | 45.5 (37.4-53.9) |
| <b>Child race</b>                                     | White     | 61.4 (39.5-79.4) | 50.0 (40.5-58.7) | 77.2 (64.2-86.5) | 62.9 (54.8-70.3) |
|                                                       | Non-white | 38.6 (20.5-60.4) | 50.4 (41.3-59.5) | 22.8 (13.5-35.8) | 37.1 (29.7-45.2) |
| <b>Child school dropout</b>                           | Yes       | 8.6 (2.4-26.5)   | 6.7 (3.1-13.8)   | 2.9 (1.3-6.4)    | 2.9 (1.3-6.4)    |
|                                                       | No        | 91.4 (73.5-97.6) | 93.3 (86.2-96.9) | 97.0 (93.6-98.7) | 97.0 (93.6-98.7) |
| <b>Child school failure</b>                           | Yes       | 12.0 (4.3-29.4)  | 13.4 (8.2-21.1)  | 35.2 (24.4-47.8) | 32.4 (25.7-40.0) |
|                                                       | No        | 88.0 (70.6-95.7) | 86.6 (78.9-91.8) | 64.8 (52.2-75.6) | 67.6 (60.0-74.3) |
| <b>Child abuse</b>                                    | Yes       | 45.2 (25.9-66.0) | 22.0 (15.5-30.2) | 40.9 (32.7-49.6) | 37.0 (24.5-51.5) |
|                                                       | No        | 54.8 (34.0-74.1) | 78.0 (69.8-84.5) | 59.1 (50.4-67.3) | 63.0 (48.5-75.5) |
| <b>Child emotional disorders<sup>b</sup></b>          | Yes       | 37.8 (20.3-59.2) | 41.8 (33.1-51.1) | 50.6 (37.3-63.9) | 50.9 (42.6-59.3) |
|                                                       | No        | 62.2 (40.8-79.7) | 58.2 (48.9-66.9) | 49.4 (36.1-62.7) | 49.0 (40.7-57.3) |
| <b>Child conduct disorders<sup>c</sup></b>            | Yes       | 51.8 (31.4-71.6) | 19.4 (13.2-27.5) | 25.1 (15.8-37.6) | 34.0 (25.9-43.2) |
|                                                       | No        | 48.2 (28.4-68.6) | 80.6 (72.5-86.8) | 74.8 (62.4-84.2) | 66.0 (56.8-74.1) |
| <b>Child attention-deficit/hyperactivity disorder</b> | Yes       | 54.8 (34.1-74.0) | 51.1 (42.1-60.1) | 47.4 (34.3-60.9) | 38.0 (30.4-46.3) |
|                                                       | No        | 45.2 (26.0-65.9) | 48.9 (39.9-57.9) | 52.6 (39.1-65.7) | 62.0 (53.7-69.6) |
| <b>Enrolled in welfare program</b>                    | Yes       | 11.3 (3.8-29.2)  | 18.0 (11.5-26.5) | 27.1 (17.4-39.7) | 37.4 (29.6-45.9) |
|                                                       | No        | 88.7 (70.8-96.2) | 82.2 (73.5-88.5) | 72.9 (60.3-82.6) | 62.6 (54.1-70.4) |
| <b>Maternal years of schooling</b>                    | 0-8y      | 93.3 (79.3-98.1) | 87.9 (80.9-92.6) | 84.0 (72.6-91.2) | 95.4 (92.0-97.4) |
|                                                       | 9>y       | 6.7 (1.9-20.7)   | 12.1 (7.4-19.1)  | 16.0 (8.8-27.4)  | 4.6 (2.6-8.0)    |
| <b>Maternal unemployment</b>                          | Yes       | 7.0 (2.0-21.6)   | 17.4 (11.4-25.7) | 7.7 (3.2-17.3)   | 7.2 (4.5-11.3)   |
|                                                       | No        | 93.0 (78.4-98.0) | 82.6 (74.3-88.6) | 92.3 (82.7-96.8) | 92.8 (88.7-95.5) |
| <b>Maternal psychopathology</b>                       | Yes       | 43.8 (24.4-65.3) | 37.0 (28.5-46.4) | 56.0 (42.0-69.1) | 57.8 (49.6-65.5) |
|                                                       | No        | 56.2 (34.7-75.6) | 63.0 (53.6-71.5) | 44.0 (30.9-58.0) | 42.2 (34.5-50.4) |

<sup>a</sup>Percentages are weighted to account for oversampling of children at high risk of mental disorders.<sup>b</sup>Emotional disorders included mood and anxiety disorders.<sup>c</sup>Conduct disorders included oppositional-defiant disorder and conduct disorder.
